# Supplementary material for: Psychotic Experiences and Psychotic Disorders at Age 18 in Relation to Psychotic Experiences at Age 12 in a Longitudinal Population-Based Cohort Study
Source: Atypon-hosted journal article supplement (doi:10.1176/appi.ajp.2013.12060768), 2013-05-17
Supplement: 742_ds001.pdf [file 742_ds001.pdf]

**Table S1:** Number (%) rated as having each type of suspected or definite psychotic experiences

|                           | <b>None</b> |         | <b>Suspected</b> |        | <b>Definite</b> |        |
|---------------------------|-------------|---------|------------------|--------|-----------------|--------|
| Auditory hallucinations   | 4470        | (94.6%) | 107              | (2.3%) | 146             | (3.1%) |
| Visual hallucinations     | 4522        | (95.8%) | 88               | (1.9%) | 112             | (2.4%) |
| Delusions (spied on)      | 4641        | (98.3%) | 55               | (1.2%) | 26              | (0.6%) |
| Delusions (persecution)   | 4685        | (99.3%) | 22               | (0.5%) | 12              | (0.3%) |
| Delusions (thoughts read) | 4706        | (99.6%) | 12               | (0.3%) | 6               | (0.1%) |
| Delusions (reference)     | 4691        | (99.3%) | 23               | (0.5%) | 8               | (0.2%) |
| Delusions (control)       | 4714        | (99.8%) | 6                | (0.1%) | 4               | (0.1%) |
| Delusions (grandiosity)   | 4702        | (99.6%) | 13               | (0.3%) | 5               | (0.1%) |
| Delusions (other)         | 4710        | (99.8%) | 4                | (0.1%) | 4               | (0.1%) |
| Thought broadcast         | 4683        | (99.2%) | 28               | (0.6%) | 8               | (0.2%) |
| Thought insertion         | 4691        | (99.4%) | 15               | (0.3%) | 13              | (0.3%) |
| Thought withdrawal        | 4714        | (99.9%) | 4                | (0.1%) | 1               | (0.0%) |
| Any                       | 4291        | (90.8%) | 203              | (4.3%) | 230             | (4.9%) |

**Table S2:** Number (%) of individuals with clinical characteristics in relation to attributions

|                       |                  | Psychotic experience    |         |                |         |                      |
|-----------------------|------------------|-------------------------|---------|----------------|---------|----------------------|
|                       |                  | Attributed <sup>a</sup> |         | Non-attributed |         | p-value <sup>b</sup> |
| Frequency past month  | None             | 48                      | (85.7%) | 209            | (56.5%) | <0.001               |
|                       | Occasional       | 8                       | (14.3%) | 96             | (26.0%) |                      |
|                       | Weekly           | 0                       | (0.0%)  | 29             | (7.8%)  |                      |
|                       | Most days        | 0                       | (0.0%)  | 36             | (9.7%)  |                      |
| Affect                | Very pleasant    | 1                       | (1.8%)  | 20             | (5.4%)  | 0.082                |
|                       | Pleasant         | 4                       | (7.1%)  | 40             | (10.8%) |                      |
|                       | Neutral          | 33                      | (58.9%) | 161            | (43.4%) |                      |
|                       | Distressing      | 11                      | (19.6%) | 81             | (21.8%) |                      |
|                       | Very distressing | 7                       | (12.5%) | 69             | (18.6%) |                      |
| Social function       | Very positive    | 1                       | (1.8%)  | 6              | (1.6%)  | 0.003                |
|                       | Positive         | 0                       | (0.0%)  | 9              | (2.4%)  |                      |
|                       | Neutral          | 54                      | (96.4%) | 297            | (80.1%) |                      |
|                       | Negative         | 1                       | (1.8%)  | 29             | (7.8%)  |                      |
|                       | Very negative    | 0                       | (0.0%)  | 30             | (8.1%)  |                      |
| Occupational function | Very positive    | 0                       | (0.0%)  | 3              | (0.8%)  | 0.012                |
|                       | Positive         | 0                       | (0.0%)  | 3              | (0.8%)  |                      |
|                       | Neutral          | 53                      | (94.6%) | 299            | (80.6%) |                      |
|                       | Negative         | 3                       | (5.4%)  | 40             | (10.8%) |                      |
|                       | Very negative    | 0                       | (0.0%)  | 26             | (7.0%)  |                      |

<sup>a</sup> attributed to sleep/fever; <sup>b</sup> p-value for frequency is for linear trend; p-value for affect, social, and occupational function is from linear and quadratic terms; occupational function collapsed into 3 categories to enable model convergence

**Table S3:** Professional help-seeking behaviour in relation to sex and socio-economic status

|                     |             | Suspected or definite PEs |     |         |         | Definite PEs |     |         |         |
|---------------------|-------------|---------------------------|-----|---------|---------|--------------|-----|---------|---------|
|                     |             | Help-seeking              |     |         |         | Help-seeking |     |         |         |
|                     |             | No                        | Yes | (%)     | p-value | No           | Yes | (%)     | p-value |
| <b>Sex</b>          | Male        | 122                       | 12  | (9.0%)  | 0.094   | 52           | 9   | (14.8%) | 0.147   |
|                     | Female      | 198                       | 35  | (15.0%) |         | 102          | 32  | (23.9%) |         |
| <b>Social class</b> | I (highest) | 38                        | 3   | (7.3%)  | 0.551   | 18           | 2   | (10.0%) | 0.436   |
|                     | II          | 107                       | 15  | (12.3%) |         | 52           | 14  | (21.2%) |         |
|                     | III         | 105                       | 17  | (13.9%) |         | 47           | 15  | (24.2%) |         |
|                     | IV          | 14                        | 2   | (12.5%) |         | 7            | 2   | (22.2%) |         |
|                     | V (lowest)  | 4                         | 0   | (0.0%)  |         | 2            | 0   | (0.0%)  |         |

**Table S4:** Positive predictive values and sensitivities for frequency of non-attributed suspected or definite psychotic experiences at age 12 in relation to psychotic disorder at age 18

|                                    |           | Psychotic disorder<br>age 18 |     | PPV   |                | Sensitivity |                |
|------------------------------------|-----------|------------------------------|-----|-------|----------------|-------------|----------------|
|                                    |           | No                           | Yes |       |                |             |                |
| <b>Psychotic experience age 12</b> |           |                              |     |       |                |             |                |
| 6- month frequency                 | None      | 3,554                        | 36  |       |                |             |                |
|                                    | 1-2 times | 232                          | 9   | 5.8%  | (5.0%, 6.5%)   | 41.9%       | (40.4%, 43.5%) |
|                                    | Monthly   | 94                           | 6   | 8.1%  | (7.2%, 8.9%)   | 27.4%       | (26.0%, 28.8%) |
|                                    | Weekly    | 69                           | 2   | 9.9%  | (9.0%, 10.8%)  | 17.7%       | (16.6%, 18.9%) |
|                                    | Daily     | 31                           | 9   | 22.5% | (21.2%, 23.8%) | 14.5%       | (13.4%, 15.6%) |

**Table S5:** Comparison of prevalence estimates for psychotic outcomes based on data samples derived from observed data and imputed data using multiple imputations (see key below for abbreviations)

| Sample Size                            |                                                 | Suspected or Definite PE age 18 |          |               | Psychotic Disorder age 18 |          |                 |
|----------------------------------------|-------------------------------------------------|---------------------------------|----------|---------------|---------------------------|----------|-----------------|
|                                        |                                                 | %                               | (SE)     | [95% CI]      | %                         | (SE)     | [95% CI]        |
| N=4724<br>(observed)                   | Suspected                                       | 0.043                           | (0.0029) | [0.037 0.048] | 0.017                     | (0.0019) | [0.013 0.020]   |
|                                        | Definite                                        | 0.049                           | (0.0031) | [0.043 0.055] |                           |          |                 |
| N=7456<br>(MI based)                   | Suspected                                       | 0.044                           | (0.0028) | [0.038 0.049] | 0.016                     | (0.0017) | [0.013 0.019]   |
|                                        | Definite                                        | 0.048                           | (0.0028) | [0.042 0.053] |                           |          |                 |
| N=14229<br>(MI based)                  | Suspected                                       | 0.047                           | (0.0024) | [0.042 0.052] | 0.016                     | (0.0014) | [0.0128 0.0183] |
|                                        | Definite                                        | 0.050                           | (0.0024) | [0.045 0.054] |                           |          |                 |
| <b>Suspected or Definite PE age 12</b> |                                                 |                                 |          |               |                           |          |                 |
| N=6796<br>(observed)                   | None                                            | 0.562                           | (0.0060) | [0.549 0.573] |                           |          |                 |
|                                        | Self-report PLE                                 | 0.205                           | (0.0049) | [0.195 0.214] |                           |          |                 |
|                                        | Interviewer rated UE                            | 0.097                           | (0.0036) | [0.090 0.105] |                           |          |                 |
|                                        | Interviewer rated PE attributed to sleep/fever  | 0.021                           | (0.0017) | [0.017 0.024] |                           |          |                 |
|                                        | Interviewer rated PE suspected (not attributed) | 0.069                           | (0.0031) | [0.063 0.075] |                           |          |                 |
|                                        | Interviewer rated PE definite (not attributed)  | 0.047                           | (0.0026) | [0.042 0.052] |                           |          |                 |
|                                        |                                                 |                                 |          |               |                           |          |                 |
| N=7456<br>(MI based)                   | None                                            | 0.557                           | (0.0059) | [0.545 0.569] |                           |          |                 |
|                                        | Self-report PLE                                 | 0.206                           | (0.0048) | [0.196 0.215] |                           |          |                 |
|                                        | Interviewer rated UE                            | 0.098                           | (0.0036) | [0.091 0.105] |                           |          |                 |
|                                        | Interviewer rated PE attributed to sleep/fever  | 0.021                           | (0.0017) | [0.018 0.024] |                           |          |                 |
|                                        | Interviewer rated PE suspected (not attributed) | 0.069                           | (0.0031) | [0.064 0.076] |                           |          |                 |
|                                        | Interviewer rated PE definite (not attributed)  | 0.048                           | (0.0026) | [0.043 0.054] |                           |          |                 |
|                                        |                                                 |                                 |          |               |                           |          |                 |
| N=14229<br>(MI based)                  | None                                            | 0.548                           | (0.0055) | [0.537 0.558] |                           |          |                 |
|                                        | Self-report PLE                                 | 0.211                           | (0.0043) | [0.202 0.219] |                           |          |                 |
|                                        | Interviewer rated UE                            | 0.099                           | (0.0034) | [0.093 0.106] |                           |          |                 |
|                                        | Interviewer rated PE attributed to sleep/fever  | 0.022                           | (0.0016) | [0.019 0.025] |                           |          |                 |
|                                        | Interviewer rated PE suspected (not attributed) | 0.072                           | (0.0027) | [0.066 0.077] |                           |          |                 |
|                                        | Interviewer rated PE definite (not attributed)  | 0.049                           | (0.0023) | [0.044 0.053] |                           |          |                 |
|                                        |                                                 |                                 |          |               |                           |          |                 |

**Table S6:** Comparison of estimates of association between experiences at age 12 and psychotic experiences at age 18 based on data samples derived from observed data and imputed data

|                       |                                                 | <b>Definite Psychotic experience at age 18</b> |             |                 |
|-----------------------|-------------------------------------------------|------------------------------------------------|-------------|-----------------|
|                       |                                                 | <b>OR</b>                                      | <b>(SE)</b> | <b>[95% CI]</b> |
| N=4060<br>(observed)  | None                                            | 1                                              |             |                 |
|                       | Self-report PLE                                 | 2.26                                           | (0.51)      | [1.45 3.50]     |
|                       | Interviewer rated UE                            | 2.90                                           | (0.75)      | [1.75 4.81]     |
|                       | Interviewer rated PE attributed to sleep/fever  | 7.42                                           | (2.75)      | [3.59 15.35]    |
|                       | Interviewer rated PE suspected (not attributed) | 6.22                                           | (1.48)      | [3.90 9.90]     |
|                       | Interviewer rated PE definite (not attributed)  | 10.36                                          | (2.54)      | [6.40 16.75]    |
| N=7456<br>(MI based)  | None                                            | 1                                              |             |                 |
|                       | Self-report PLE                                 | 2.07                                           | (0.38)      | [1.44 2.97]     |
|                       | Interviewer rated UE                            | 2.52                                           | (0.55)      | [1.65 3.86]     |
|                       | Interviewer rated PE attributed to sleep/fever  | 5.81                                           | (1.96)      | [2.99 11.26]    |
|                       | Interviewer rated PE suspected (not attributed) | 5.05                                           | (1.06)      | [3.34 7.63]     |
|                       | Interviewer rated PE definite (not attributed)  | 7.16                                           | (1.56)      | [4.67 10.98]    |
| N=14229<br>(MI based) | None                                            | 1                                              |             |                 |
|                       | Self-report PLE                                 | 1.97                                           | (0.33)      | [1.42 2.72]     |
|                       | Interviewer rated UE                            | 2.32                                           | (0.48)      | [1.55 3.49]     |
|                       | Interviewer rated PE attributed to sleep/fever  | 3.92                                           | (1.09)      | [2.26 6.80]     |
|                       | Interviewer rated PE suspected (not attributed) | 4.21                                           | (0.92)      | [2.74 6.47]     |
|                       | Interviewer rated PE definite (not attributed)  | 5.85                                           | (1.49)      | [3.54 9.68]     |

**Table S7:** Comparison of estimates of association between experiences at age 12 and psychotic disorder at age 18 based on data samples derived from observed data and imputed data

|                                                 |                                                 | Psychotic disorder at age 18 |        |              |
|-------------------------------------------------|-------------------------------------------------|------------------------------|--------|--------------|
|                                                 |                                                 | OR                           | (SE)   | [95% CI]     |
| N=4060<br>(observed)                            | None                                            | 1                            |        |              |
|                                                 | Self-report PLE                                 | 1.19                         | (0.55) | [0.49 2.92]  |
|                                                 | Interviewer rated UE                            | 3.40                         | (1.38) | [1.53 7.55]  |
|                                                 | Interviewer rated PE attributed to sleep/fever  | 5.85                         | (3.75) | [1.67 20.54] |
|                                                 | Interviewer rated PE suspected (not attributed) | 5.56                         | (2.21) | [2.55 12.10] |
|                                                 | Interviewer rated PE definite (not attributed)  | 12.69                        | (4.68) | [6.17 26.13] |
|                                                 | N=7456<br>(MI based)                            | None                         | 1      |              |
| Self-report PLE                                 |                                                 | 1.58                         | (0.55) | [0.80 3.14]  |
| Interviewer rated UE                            |                                                 | 2.85                         | (1.02) | [1.42 5.78]  |
| Interviewer rated PE attributed to sleep/fever  |                                                 | 4.86                         | (2.58) | [1.72 13.7]  |
| Interviewer rated PE suspected (not attributed) |                                                 | 4.75                         | (1.64) | [2.41 9.37]  |
| Interviewer rated PE definite (not attributed)  |                                                 | 8.41                         | (2.83) | [4.35 16.26] |
| N=14229<br>(MI based)                           |                                                 | None                         | 1      |              |
|                                                 | Self-report PLE                                 | 1.68                         | (0.50) | [0.94 3.01]  |
|                                                 | Interviewer rated UE                            | 2.38                         | (0.80) | [1.23 4.62]  |
|                                                 | Interviewer rated PE attributed to sleep/fever  | 3.36                         | (1.67) | [1.27 8.92]  |
|                                                 | Interviewer rated PE suspected (not attributed) | 3.85                         | (1.31) | [1.97 7.51]  |
|                                                 | Interviewer rated PE definite (not attributed)  | 6.44                         | (2.31) | [3.18 13.06] |

PE (Psychotic Experience); PLE (Psychotic-like experience); UE (Unusual Experience); MI (multiple imputations); OR (odds ratio); SE (standard error)

**Table S8:** Number (%) of individuals with clinical characteristics in relation to definite vs suspected psychotic experiences

|                       |                  | Psychotic experience |         |          |         |                      |
|-----------------------|------------------|----------------------|---------|----------|---------|----------------------|
|                       |                  | Suspected            |         | Definite |         | p-value <sup>a</sup> |
| Frequency past month  | None             | 134                  | (66.7%) | 123      | (54.7%) | <0.001               |
|                       | Occasional       | 52                   | (25.9%) | 52       | (23.1%) |                      |
|                       | Weekly           | 8                    | (4.0%)  | 21       | (9.3%)  |                      |
|                       | Most days        | 7                    | (3.5%)  | 29       | (12.9%) |                      |
| Affect                | Very pleasant    | 6                    | (3.0%)  | 15       | (6.7%)  | <0.001               |
|                       | Pleasant         | 16                   | (7.9%)  | 28       | (12.4%) |                      |
|                       | Neutral          | 121                  | (59.9%) | 73       | (32.4%) |                      |
|                       | Distressing      | 40                   | (19.8%) | 52       | (23.1%) |                      |
|                       | Very distressing | 19                   | (9.4%)  | 57       | (25.3%) |                      |
| Social function       | Very positive    | 0                    | (0.0%)  | 7        | (3.1%)  | <0.001               |
|                       | Positive         | 1                    | (0.5%)  | 8        | (3.6%)  |                      |
|                       | Neutral          | 185                  | (91.6%) | 166      | (73.8%) |                      |
|                       | Negative         | 11                   | (5.4%)  | 19       | (8.4%)  |                      |
|                       | Very negative    | 5                    | (2.5%)  | 25       | (11.1%) |                      |
| Occupational function | Very positive    | 1                    | (0.5%)  | 2        | (0.9%)  | <0.001               |
|                       | Positive         | 1                    | (0.5%)  | 2        | (0.9%)  |                      |
|                       | Neutral          | 181                  | (89.6%) | 171      | (76.0%) |                      |
|                       | Negative         | 15                   | (7.4%)  | 28       | (12.4%) |                      |
|                       | Very negative    | 4                    | (2.0%)  | 22       | (9.8%)  |                      |
| Help-seeking          | No               | 193                  | (97.0%) | 180      | (80.4%) | <0.001               |
|                       | Yes              | 6                    | (3.0%)  | 44       | (19.6%) |                      |

<sup>a</sup>p-value for frequency is for linear trend; p-value for affect, social, and occupational function is from linear and quadratic terms



**Table S9:** Number (%) rated as having suspected or definite hallucinations, delusions and thought disorder at age 18, by gender and social class

|                     | Sex    | PE absent |         | PE present |        |             |
|---------------------|--------|-----------|---------|------------|--------|-------------|
|                     |        | N         | (%)     | N          | (%)    | 95% CI      |
| Hallucinations      | Male   | 1920      | (93.6%) | 131        | (6.4%) | 5.4%, 7.5%  |
|                     | Female | 2434      | (91.2%) | 235        | (8.8%) | 7.8%, 9.9%  |
| Delusions           | Male   | 2008      | (97.9%) | 43         | (2.1%) | 1.5%, 2.8%  |
|                     | Female | 2575      | (96.5%) | 94         | (3.5%) | 2.9%, 4.3%  |
| Thought disorder    | Male   | 2030      | (99.0%) | 21         | (1.0%) | 0.6%, 1.6%  |
|                     | Female | 2625      | (98.4%) | 44         | (1.7%) | 1.2%, 2.2%  |
| <b>Social class</b> |        |           |         |            |        |             |
| Hallucinations      | I      | 706       | 94.5%   | 41         | 5.5%   | 4.0%, 7.4%  |
|                     | II     | 1771      | 93.8%   | 118        | 6.2%   | 5.2%, 7.4%  |
|                     | III    | 1189      | 90.1%   | 131        | 9.9%   | 8.4%, 11.7% |
|                     | IV     | 124       | 87.9%   | 17         | 12.1%  | 7.2%, 18.6% |
|                     | V      | 17        | 81.0%   | 4          | 19.0%  | 5.4%, 41.9% |
| Delusions           | I      | 730       | 97.7%   | 17         | 2.3%   | 1.3%, 3.6%  |
|                     | II     | 1845      | 97.7%   | 44         | 2.3%   | 1.7%, 3.1%  |
|                     | III    | 1280      | 97.0%   | 40         | 3.0%   | 2.2%, 4.1%  |
|                     | IV     | 135       | 95.7%   | 6          | 4.3%   | 1.6%, 9.0%  |
|                     | V      | 19        | 90.5%   | 2          | 9.5%   | 1.2%, 30.4% |
| Thought disorder    | I      | 737       | 98.7%   | 10         | 1.3%   | 0.6%, 2.4%  |
|                     | II     | 1869      | 98.9%   | 20         | 1.1%   | 0.6%, 1.6%  |
|                     | III    | 1303      | 98.7%   | 17         | 1.3%   | 0.8%, 2.1%  |
|                     | IV     | 137       | 97.2%   | 4          | 2.8%   | 0.8%, 7.1%  |
|                     | V      | 20        | 95.2%   | 1          | 4.8%   | 0.1%, 23.8% |

<sup>a</sup> either suspected or definite PE (psychotic experience)

**Table 10:** Sensitivity, specificity and positive predictive value (PPV) of age 12 hallucinations, delusions and thought disorder in relation to psychotic disorder at age 18

|                                       | Psychotic disorder age 18 |                |             |                |      |              |
|---------------------------------------|---------------------------|----------------|-------------|----------------|------|--------------|
|                                       | Sensitivity               | (95%CI)        | Specificity | (95%CI)        | PPV  | (95%CI)      |
| <b>Age 12 experiences<sup>a</sup></b> |                           |                |             |                |      |              |
| Any hallucination                     | 38.7%                     | (37.2%, 40.2%) | 91.5%       | (90.6%, 92.3%) | 6.6% | (5.8%, 7.3%) |
| Any delusion                          | 27.4%                     | (26.1%, 28.8%) | 95.0%       | (94.3%, 95.7%) | 7.8% | (7.0%, 8.7%) |
| Any thought disorder                  | 11.3%                     | (10.3%, 12.3%) | 97.5%       | (97.0%, 97.9%) | 6.4% | (5.7%, 7.2%) |
| Any PE                                | 46.8%                     | (45.2%, 48.3%) | 87.1%       | (86.1%, 88.1%) | 5.3% | (4.6%, 6.0%) |

<sup>a</sup> either suspected or definite PE (psychotic experience), including attributed and non-attributed experiences

**Table 11:** Sensitivity, specificity and positive predictive value (PPV) of age 12 hallucinations, delusions and thought disorder in relation to psychotic disorder at age 18, by sex

|                                       | Sex    | Psychotic disorder age 18 |                |             |                |       |              |
|---------------------------------------|--------|---------------------------|----------------|-------------|----------------|-------|--------------|
|                                       |        | Sensitivity               | (95%CI)        | Specificity | (95%CI)        | PPV   | (95%CI)      |
| <b>Age 12 experiences<sup>a</sup></b> |        |                           |                |             |                |       |              |
| Any hallucination                     | Male   | 30.8%                     | (28.6%, 32.9%) | 92.2%       | (90.9%, 93.4%) | 2.8%  | (2.0%, 3.5%) |
|                                       | Female | 40.8%                     | (38.8%, 48.8%) | 90.9%       | (89.7%, 92.1%) | 9.1%  | (7.9, 10.2%) |
| Any delusion                          | Male   | 23.1%                     | (21.1%, 25.0%) | 95.0%       | (94.0%, 96.0%) | 3.3%  | (2.4, 4.1%)  |
|                                       | Female | 28.6%                     | (26.7%, 30.4%) | 95.0%       | (94.1%, 95.9%) | 11.2% | (9.9, 12.5%) |
| Any thought interference              | Male   | 30.8%                     | (28.6%, 32.9%) | 97.1%       | (96.3%, 97.9%) | 7.1%  | (6.0, 8.3%)  |
|                                       | Female | 6.1%                      | (5.1%, 7.1%)   | 97.7%       | (97.1%, 98.4%) | 5.7%  | (4.7, 6.6%)  |
| Any PE                                | Male   | 30.8%                     | (28.6%, 32.9%) | 87.5%       | (86.0%, 89.0%) | 1.8%  | (1.2, 2.4%)  |
|                                       | Female | 51.0%                     | (49.0%, 53.1%) | 86.8%       | (85.4%, 88.2%) | 7.9%  | (6.8, 9.0%)  |

<sup>a</sup> either suspected or definite PE (psychotic experience), including attributed and non-attributed experiences

**Table 12:** Sensitivity, specificity and positive predictive value (PPV) of age 12 hallucinations, delusions and thought disorder in relation to psychotic disorder at age 18, by social class

|                                       | Social class | Psychotic disorder age 18 |                |             |                 |       |               |
|---------------------------------------|--------------|---------------------------|----------------|-------------|-----------------|-------|---------------|
|                                       |              | Sensitivity               | (95%CI)        | Specificity | (95%CI)         | PPV   | (95%CI)       |
| <b>Age 12 experiences<sup>a</sup></b> |              |                           |                |             |                 |       |               |
| Any hallucination                     | I            | 33.3%                     | (29.8%, 36.9%) | 92.4%       | (90.4%, 94.3%)  | 3.7%  | (2.3%, 5.1%)  |
|                                       | II           | 47.1%                     | (44.7%, 49.4%) | 91.6%       | (90.3%, 92.9%)  | 5.4%  | (4.3%, 6.5%)  |
|                                       | III          | 33.3%                     | (30.6%, 36.1%) | 91.2%       | (89.5%, 92.8%)  | 7.5%  | (6.0%, 9.0%)  |
|                                       | IV           | 33.3%                     | (24.7%, 42.0%) | 90.2%       | (84.7%, 95.6%)  | 8.3%  | (3.3%, 13.4%) |
|                                       | V            | -                         | -              | 92.3%       | -               | -     | -             |
| Any delusion                          | I            | 16.7%                     | (13.9%, 19.5%) | 96.5%       | (95.1%, 97.9%)  | 4.0%  | (2.5%, 5.5%)  |
|                                       | II           | 29.4%                     | (27.2%, 31.6%) | 94.2%       | (93.1%, 95.3%)  | 4.9%  | (3.9%, 5.9%)  |
|                                       | III          | 29.2%                     | (26.5%, 31.8%) | 95.1%       | (93.9%, 96.4%)  | 11.3% | (9.5%, 13.1%) |
|                                       | IV           | 33.3%                     | (24.7%, 42.0%) | 95.5%       | (91.8%, 99.3%)  | 16.7% | (9.9%, 23.5%) |
|                                       | V            | -                         | -              | 92.3%       | -               | -     | -             |
| Any thought interference              | I            | 0.0%                      | -              | 0.0%        | -               | 0.0%  | -             |
|                                       | II           | 17.7%                     | (15.8%, 19.5%) | 96.7%       | (95.8%, 97.6%)  | 5.2%  | (4.1%, 6.2%)  |
|                                       | III          | 8.3%                      | (6.7%, 9.9%)   | 97.6%       | (96.7%, 98.5%)  | 6.9%  | (5.4%, 8.4%)  |
|                                       | IV           | 0.0%                      | -              | 99.1%       | (97.4%, 100.0%) | 0.0%  | -             |
|                                       | V            | -                         | -              | -           | -               | -     | -             |

|        |     |       |                |       |                |      |               |
|--------|-----|-------|----------------|-------|----------------|------|---------------|
| Any PE | I   | 50.0% | (46.3%, 53.7%) | 89.6% | (87.3%, 91.9%) | 4.1% | (2.6%, 5.5%)  |
|        | II  | 47.1% | (44.7%, 49.4%) | 86.5% | (84.8%, 88.1%) | 3.4% | (2.6%, 4.3%)  |
|        | III | 45.8% | (43.0%, 48.7%) | 86.9% | (84.9%, 88.9%) | 7.0% | (5.5%, 8.4%)  |
|        | IV  | 33.3% | (24.7%, 42.0%) | 87.5% | (81.5%, 93.5%) | 6.7% | (2.1%, 11.2%) |
|        | V   | -     | -              | 84.6% | -              | -    | -             |

<sup>a</sup> either suspected or definite PE (psychotic experience), including attributed and non-attributed experiences

## Appendix A

### Further information on measurement of psychotic experiences using the PLIKSi

If interviewers rated experiences as suspected or definitely psychotic respondents were asked about:

(a) *Frequency* during past 6-months (none, 1-2 times only, monthly,  $\geq$ weekly) and past 1-month (none, occasionally, weekly, most days)

(b) *Impact on affect* (5-point Likert-scale ranging from very pleasant to very distressing)

(c) *Impact on social function* (5-point Likert-scale ranging from very positive to very negative effect on relationships)

(d) *Impact on educational or occupational function* (5-point Likert-scale ranging from very positive to very negative effect on performance)

(e) *Help-seeking from professionals* (general practitioner, counsellor, mental health team, prescription of medication)

(f) *Onset of first experience* ( $\leq$ 3 months,  $\leq$ 1 year,  $\leq$ 5 years,  $>$ 5 years).

(g) *Attribution* (whether experiences were always attributable to sleep (hypnopompic or hypnogogic), fever, or substance use (occurring only within 2 hours of use)).

### **Further information on measurement of socio-demographic characteristics**

Data on gender were collected from birth records. Data on parental social class, maternal marital status, financial difficulty, housing type, and parental education were collected from parental questionnaires completed prior to birth of the study participant.

#### *Coding:*

Gender: coded as male (0) or female (1)

Parental social class (highest of both parents): coded as I (highest) to V (lowest)

Maternal marital status (nominal variable): coded as married (0), partner (1), or single (2)

Financial difficulty (receipt of income support): coded as no (0) or yes (1)

Housing type (nominal variable): coded as mortgaged or owned (0), privately rented (1), or council rented (2)

Parental education: coded as 4-levels, ranging from the lowest UK school-leaving qualifications (1) to degree level (4)

## Appendix B

| SIPS Criteria                                         |                                                                                                                                                                                                                                                                                            | PLIKSi equivalent                                                                                                                                                                                                                                                                                                                                                                                                                                                                                                                                                                                                                                                                       |
|-------------------------------------------------------|--------------------------------------------------------------------------------------------------------------------------------------------------------------------------------------------------------------------------------------------------------------------------------------------|-----------------------------------------------------------------------------------------------------------------------------------------------------------------------------------------------------------------------------------------------------------------------------------------------------------------------------------------------------------------------------------------------------------------------------------------------------------------------------------------------------------------------------------------------------------------------------------------------------------------------------------------------------------------------------------------|
| <p>Current Psychosis (POPS)</p>                       | <p>Psychotic symptom (rating 6) (= psychotic + affects functioning or influences thinking feeling or behaviour)</p> <p>In past month</p> <p>AND</p> <p>≥1 hour per day</p> <p>4 days per week</p> <p>For 1 month or more</p> <p>OR</p> <p>Symptom seriously disorganizing or dangerous</p> | <p>Definite psychotic symptom (+ affects functioning)</p> <p>Occurred in past month</p> <p>≥1 hour per day</p> <p>1) Most days past month (if yes must be ≥4 days per week)</p> <p>Have data on when symptoms started and whether symptoms occurred in past month – 90% started &gt;3months ago and present in past month so meet criteria for &gt;1month<br/>If started &lt;3months ago may not meet criteria for &gt;1month (although if someone has symptoms for 1 hour/day on 4 days/week it may be fairly reasonable to assume the 1 month or more criteria would be met)</p> <p>Very negative effect on social/occupational functioning equivalent to seriously disorganizing</p> |
| <p>Prodromal Syndromes (below)</p>                    | <p>No past and/or current psychosis</p>                                                                                                                                                                                                                                                    | <p>No past and/or current psychosis</p>                                                                                                                                                                                                                                                                                                                                                                                                                                                                                                                                                                                                                                                 |
| <p>Brief intermittent psychotic symptom prodromal</p> | <p>Psychotic symptom (rating 6) (= psychotic + affects functioning or influences thinking feeling or behaviour)</p>                                                                                                                                                                        | <p>Definite psychotic symptom (+ affects functioning)</p>                                                                                                                                                                                                                                                                                                                                                                                                                                                                                                                                                                                                                               |



|                                                       |                                                                                                                                                                                             |                                                                                                                                                                                                                                                                                                                                                                                         |
|-------------------------------------------------------|---------------------------------------------------------------------------------------------------------------------------------------------------------------------------------------------|-----------------------------------------------------------------------------------------------------------------------------------------------------------------------------------------------------------------------------------------------------------------------------------------------------------------------------------------------------------------------------------------|
| syndrome (BIPS)                                       | <p>Occurred in past 3 months</p> <p>Several minutes per day</p> <p>At least once per month</p>                                                                                              | <p>Occurred in past 6 months is best equivalent (75% of these also occurred in past 1 month)</p> <p>≥2 minutes per day</p> <p>At least once per month</p>                                                                                                                                                                                                                               |
| Attenuated positive symptom prodromal syndrome (APSS) | <p>Positive symptom (rating 3-5)</p> <p>Started in past year, or worse in past year</p> <p>At least once per week in past 1 month</p>                                                       | <p>Suspected psychotic experience (i.e. interviewer unable to determine that definitely psychotic, but enough info to rate as suspicious – comparable to SIPS ratings 3-5)</p> <p>Started in past year (and information from PLIKS age 16 questionnaire to identify if symptoms more frequent or more distressing since then)</p> <p>About weekly (4 times or more) in past 1 month</p> |
| Genetic risk and deterioration prodromal syndrome     | <p>Schizotypal personality disorder</p> <p>AND/OR</p> <p>1<sup>st</sup> degree relative with psychotic disorder</p> <p>AND</p> <p>≥30% drop in past-month GAF compared to 12 months ago</p> | <p>No equivalent measure</p> <p>1) Data available on parent/grandparent history of schizophrenia</p> <p>2) Data other relatives/other psychoses due to be collected in next parental questionnaire</p> <p>No equivalent measure</p>                                                                                                                                                     |

## Case Vignettes

### Case vignette 1

An 11-year old boy started to hear voices mumbling when he was alone. He had no major problems prior to this. He was slightly delayed in reaching his developmental milestones, but was an average student at school. He had a few close friends although there were occasional incidents of mild bullying by his peers. The auditory hallucinations became more frequent, intrusive, and frightening over his teenage years. At age 15 he developed a delusional belief that people could read his mind and knew everything that he was thinking. He found this very distressing, and his school performance deteriorated. By age 18 he had become very isolated and withdrawn and had been unemployed since leaving school without any qualifications. Although his parents were concerned about him he continually refused to visit his GP.

*Based on examples from the authors' clinical practice*

### Case vignette 2

A 17-year old girl developed a depressive disorder following a year in which her grandmother died and her parents separated. She had no major problems prior to this time. She had a normal development and was above average in her school performance. She was sociable and had many friends, and was involved in a number of out of school activities. A few months after the onset of her depression she developed a belief that evil spirits were communicating with her through coded messages within songs played on the radio, or written in magazine articles. She ruminated constantly about these messages and her mood deteriorated further. Following an overdose of paracetamol she was referred to the local community mental health team and commenced on antidepressant and antipsychotic medication. Her depression gradually improved and her delusional beliefs attenuated, although overvalued ideas that coded messages were being left for her still occurred occasionally. She was able to return to college to continue with her studies.

*Based on examples from the authors' clinical practice*
